# Supplementary material for: Trial of an Electronic Decision Support System to Facilitate Shared Decision Making in Community Mental Health
Source: Atypon-hosted journal article supplement (doi:10.1176/ps.62.1.pss6201_0054), 2011-01-01
Supplement: Woltmann DS screens.pdf [file Woltmann%20DS%20screens.pdf]

## Appendix

This appendix provides a graphical representation of what some of the screens of the electronic decision support system discussed in the paper looked like to the client, case manager, or both. This does not represent all of the screens required or possible as part of the electronic decision support system.

- I. The client module focuses on 11 domains commonly focused on in the community mental health setting. There is a set of screens for each. In this instance, the client is indicating his or her strength of preference for addressing issues in the Emotional Health domain.

Electronic Questionnaire - Mozilla Firefox

File Edit View History Bookmarks Tools Help

### Telling My Story: Emotional and Mental Health

We'd like to know how you feel about your **emotional and mental health**, including symptoms of your mental illness you may be experiencing.

*Click on ruler, press Next to continue.*

Happy where its at  Would like to change

Previous Next

This is an example of how a client can add custom information to his or her plan.

Here you can say more about the emotional and mental health area of your life. Click next when you are done.

*Enter answer.*

I would like to not worry about things as much.

Previous

Next

Here the clients have already chosen their top priorities to focus on.

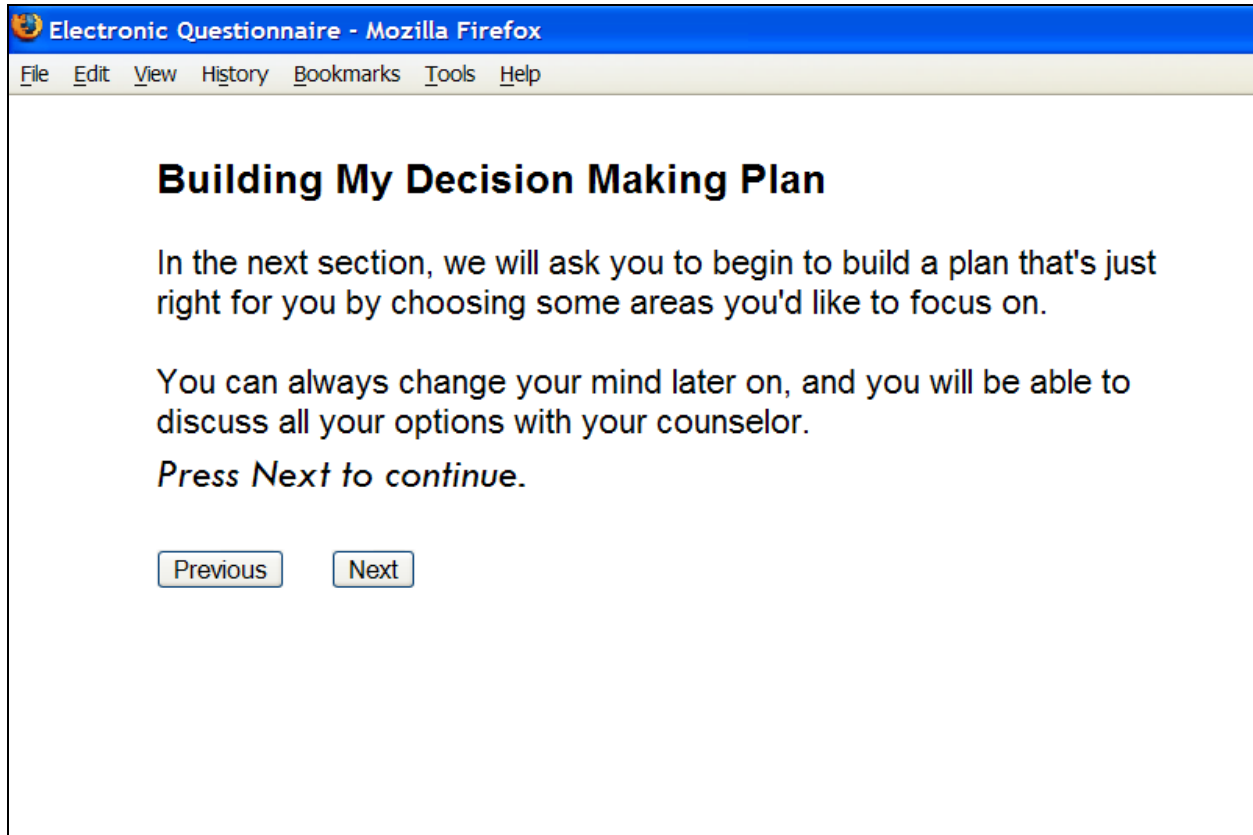

The screenshot shows a web browser window titled "Electronic Questionnaire - Mozilla Firefox". The browser's menu bar includes "File", "Edit", "View", "History", "Bookmarks", "Tools", and "Help". The main content area features a bold heading "Building My Decision Making Plan". Below the heading, there are two paragraphs of text: "In the next section, we will ask you to begin to build a plan that's just right for you by choosing some areas you'd like to focus on." and "You can always change your mind later on, and you will be able to discuss all your options with your counselor." This is followed by the instruction "Press Next to continue." At the bottom of the content area, there are two buttons: "Previous" and "Next".

**Electronic Questionnaire - Mozilla Firefox**

File Edit View History Bookmarks Tools Help

## Building My Decision Making Plan

In the next section, we will ask you to begin to build a plan that's just right for you by choosing some areas you'd like to focus on.

You can always change your mind later on, and you will be able to discuss all your options with your counselor.

*Press Next to continue.*

[Previous](#) [Next](#)

## Building My Decision Making Plan

We heard you say that you would like to work on the following area(s):

- Employment and Education
- Alcohol and Drug Use
- Emotional and Mental Health
- Physical Health

Did we get this right?

Choose one

 Yes No

[Previous](#)

[Next](#)

This is how clients are able to choose the level of interaction with the system regarding selecting services:

**Electronic Questionnaire - Mozilla Firefox**

File Edit View History Bookmarks Tools Help

## Building My Decision Making Plan

### Getting Ready for Shared Decisions

Your ideas are an important part of the shared decisions you will make with your counselor about your Plan.

For the employment and educational area, I'd like to:

Choose one

- See a list of some things I might try. I might pick some from the list.
- Just list some ideas I already have
- Wait until I see my counselor to discuss my ideas

Previous Next

## II. Representative Case Manager Screens

This screen summarizes the priorities of the clients and consumers and allows the dyad to discuss areas of concordance and discordance. This screen will re-appear in the Shared Decision Making session:

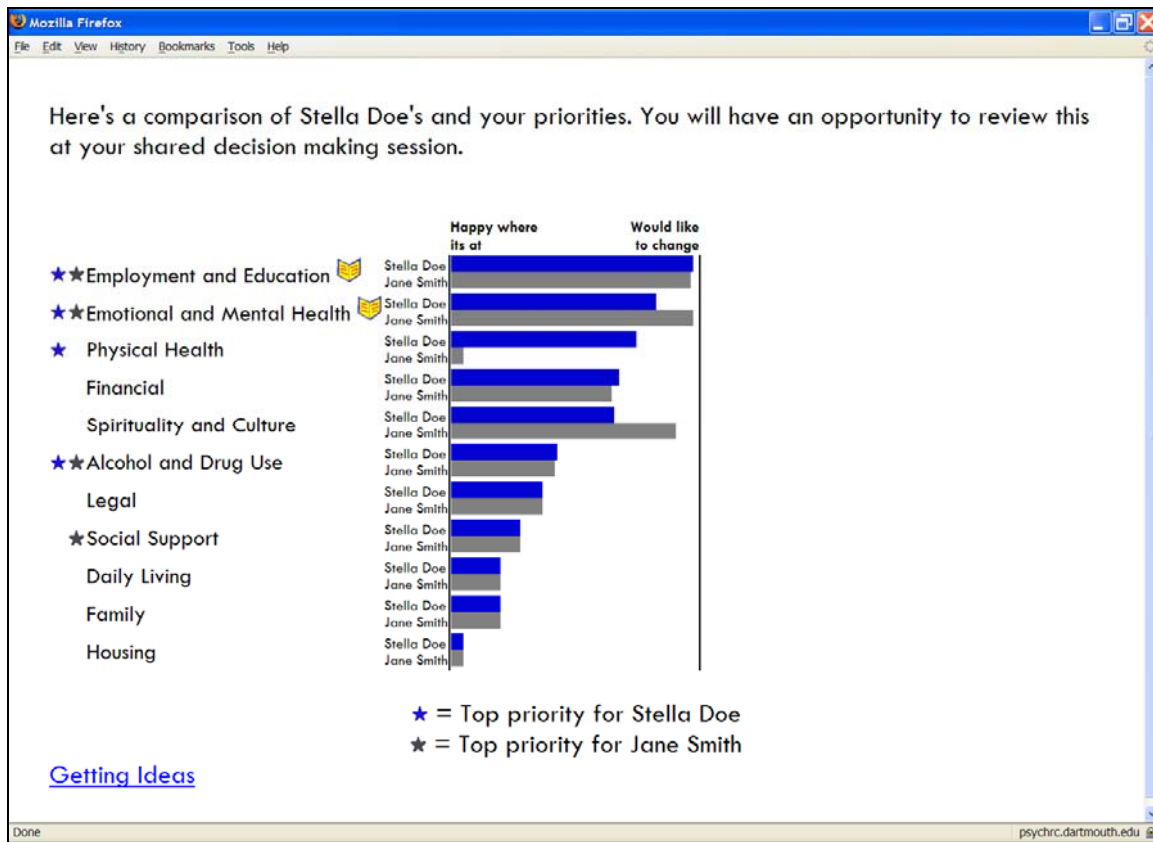

This screen tells the case manager the client's priorities for areas of focus and preferred services. On the left side, the case manager can record their ideas:

Client Idea Review - Mozilla Firefox  
File Edit View History Bookmarks Tools Help

Listed below are some ideas Stella Doe has for achieving her goals and addressing her concerns in her areas of top priority.

Please record some of your own ideas.

The ideas the two of you select will become the starting point for the shared decisions you make together.

By selecting the  you can just list ideas. By selecting the  you can view and select from a predetermined list of ideas.

| Stella Doe's ideas                                                                                                                                                       | Jane Smith's ideas                                                                                                                                                                                     |
|--------------------------------------------------------------------------------------------------------------------------------------------------------------------------|--------------------------------------------------------------------------------------------------------------------------------------------------------------------------------------------------------|
| <b>Alcohol and Drug Use</b> <ul style="list-style-type: none"><li>• I'd like someone to help me get to my AA meetings.</li></ul>                                         |   <b>Alcohol and Drug Use</b>        |
| <b>Emotional and Mental Health</b>                                                                                                                                       |   <b>Emotional and Mental Health</b> |
| <b>Employment and Education</b> <ul style="list-style-type: none"><li>• Participate in a program to support me in getting and keeping a job</li></ul>                    |   <b>Employment and Education</b>    |
| <b>Physical Health</b> <ul style="list-style-type: none"><li>• Get help quitting smoking</li><li>• Get help with my diet</li><li>• Work on an exercise program</li></ul> |   <b>Physical Health</b>             |
|                                                                                                                                                                          |   <b>Social Support</b>          |

[Next](#)

Done psychrc.dartmouth.edu

Case managers see the same lists of service options clients see:

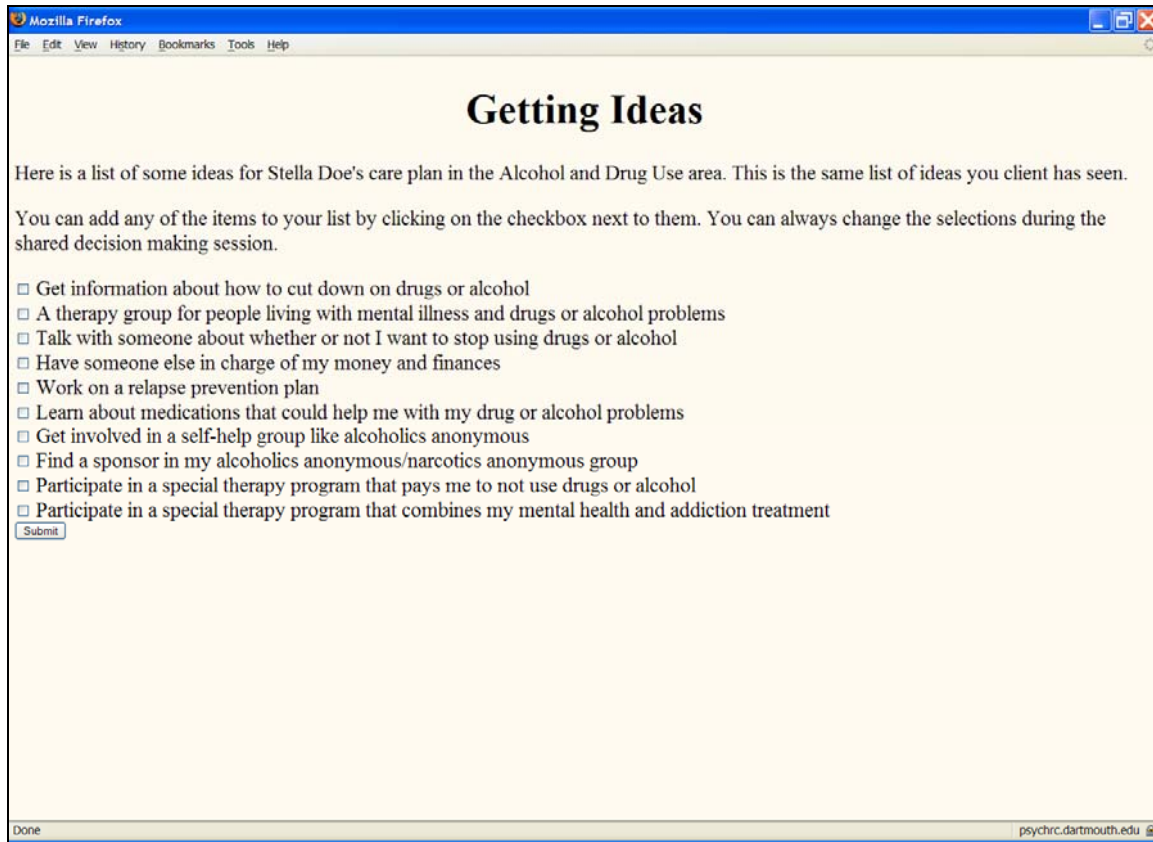

Mozilla Firefox

File Edit View History Bookmarks Tools Help

## Getting Ideas

Here is a list of some ideas for Stella Doe's care plan in the Alcohol and Drug Use area. This is the same list of ideas you client has seen.

You can add any of the items to your list by clicking on the checkbox next to them. You can always change the selections during the shared decision making session.

- Get information about how to cut down on drugs or alcohol
- A therapy group for people living with mental illness and drugs or alcohol problems
- Talk with someone about whether or not I want to stop using drugs or alcohol
- Have someone else in charge of my money and finances
- Work on a relapse prevention plan
- Learn about medications that could help me with my drug or alcohol problems
- Get involved in a self-help group like alcoholics anonymous
- Find a sponsor in my alcoholics anonymous/narcotics anonymous group
- Participate in a special therapy program that pays me to not use drugs or alcohol
- Participate in a special therapy program that combines my mental health and addiction treatment

Submit

Done psychrc.dartmouth.edu



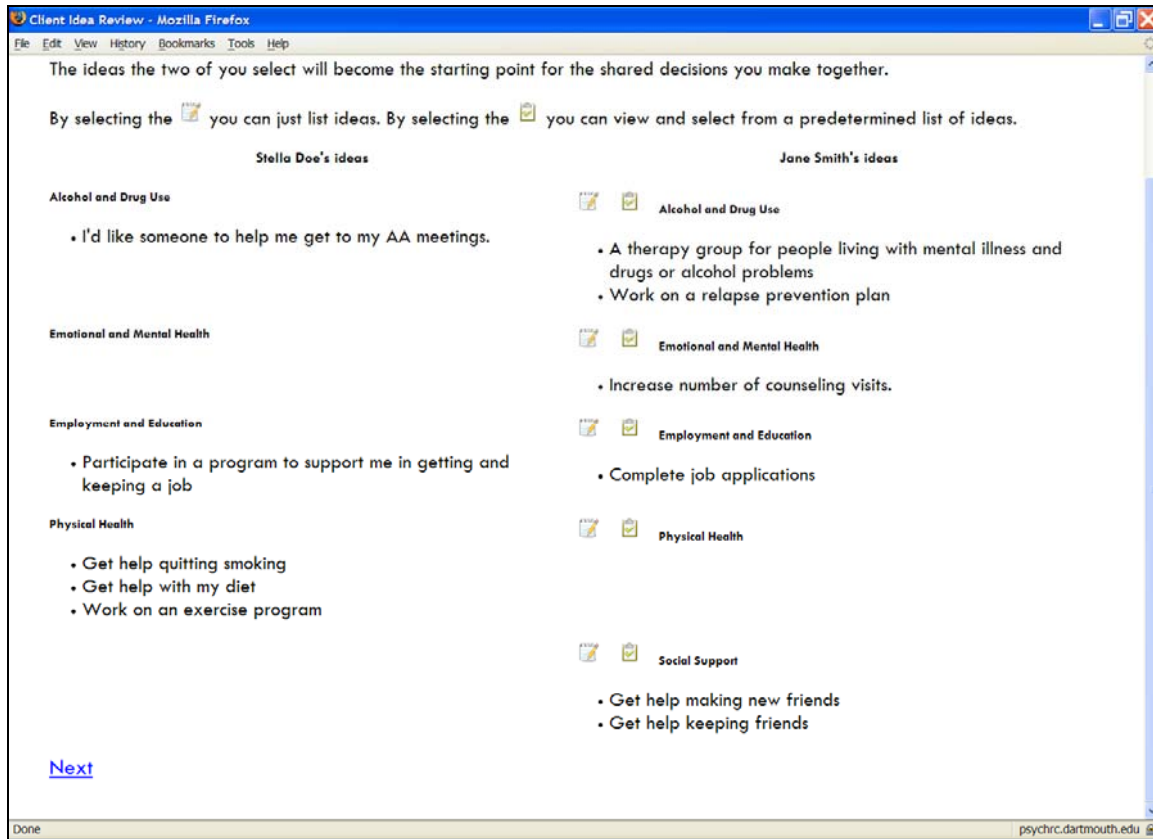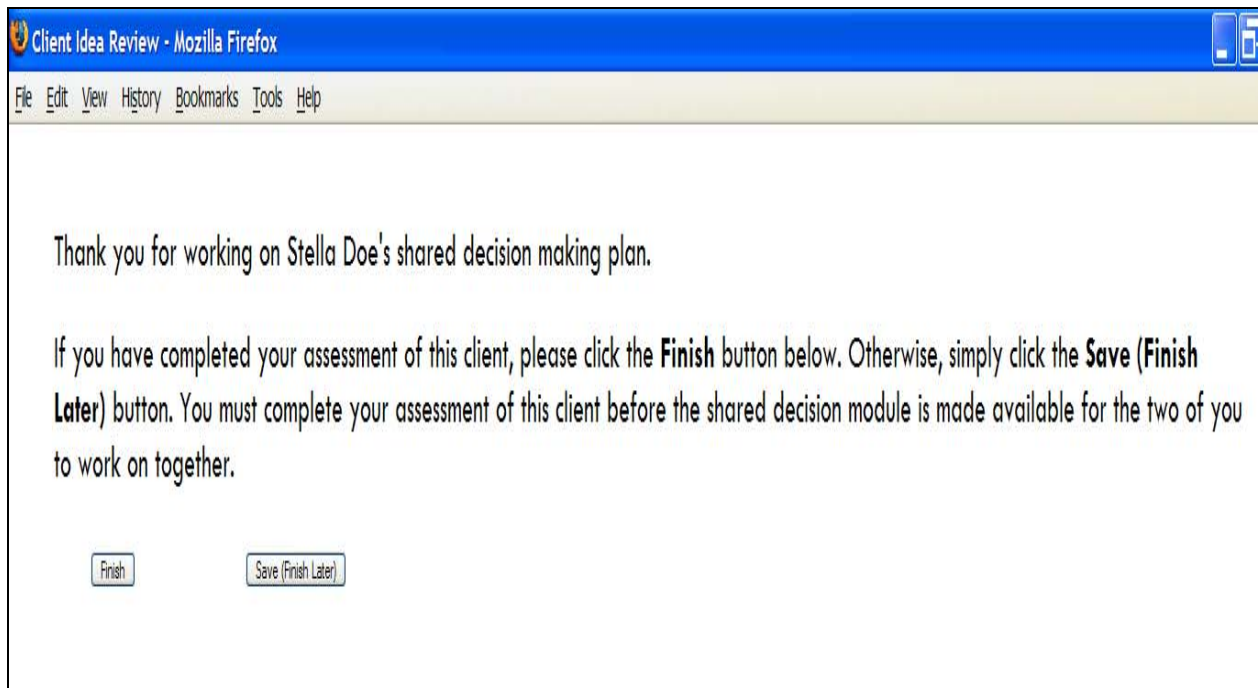

### III. Shared Decision Making Session

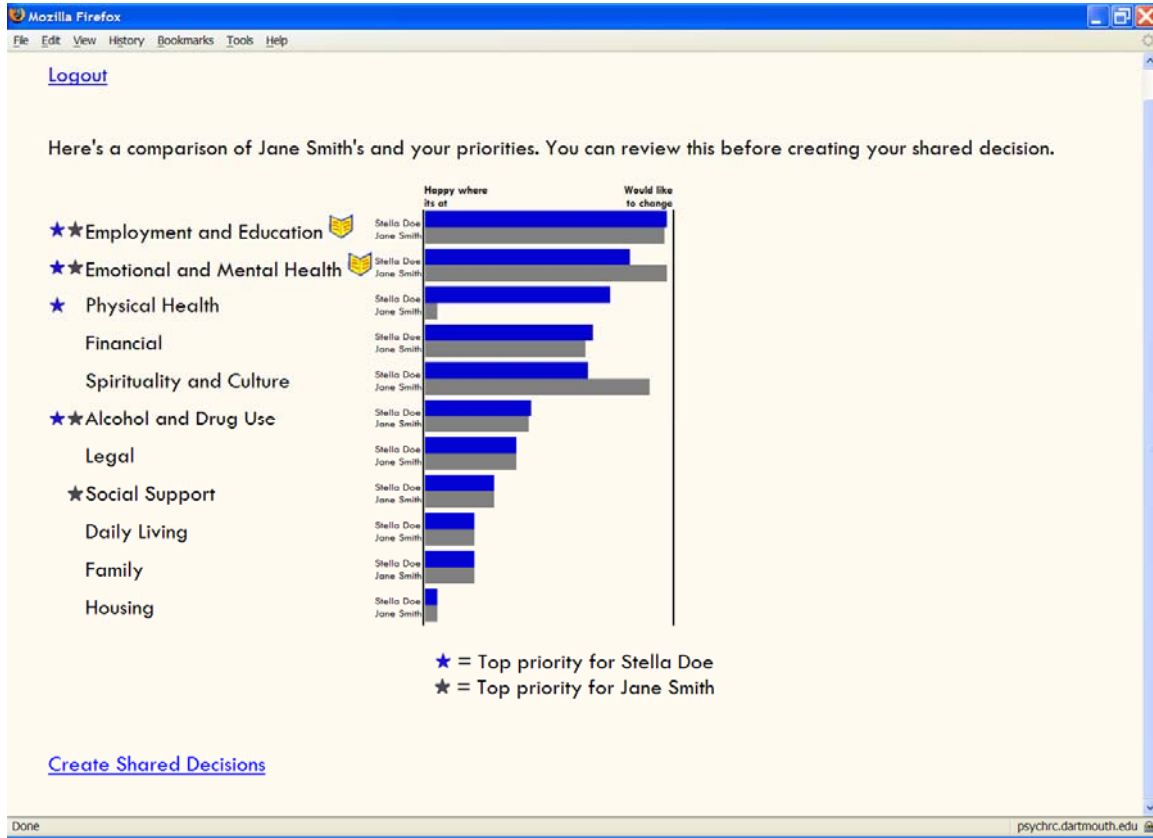

In this screen, case manager and client priorities and ideas are organized together to allow for discussion

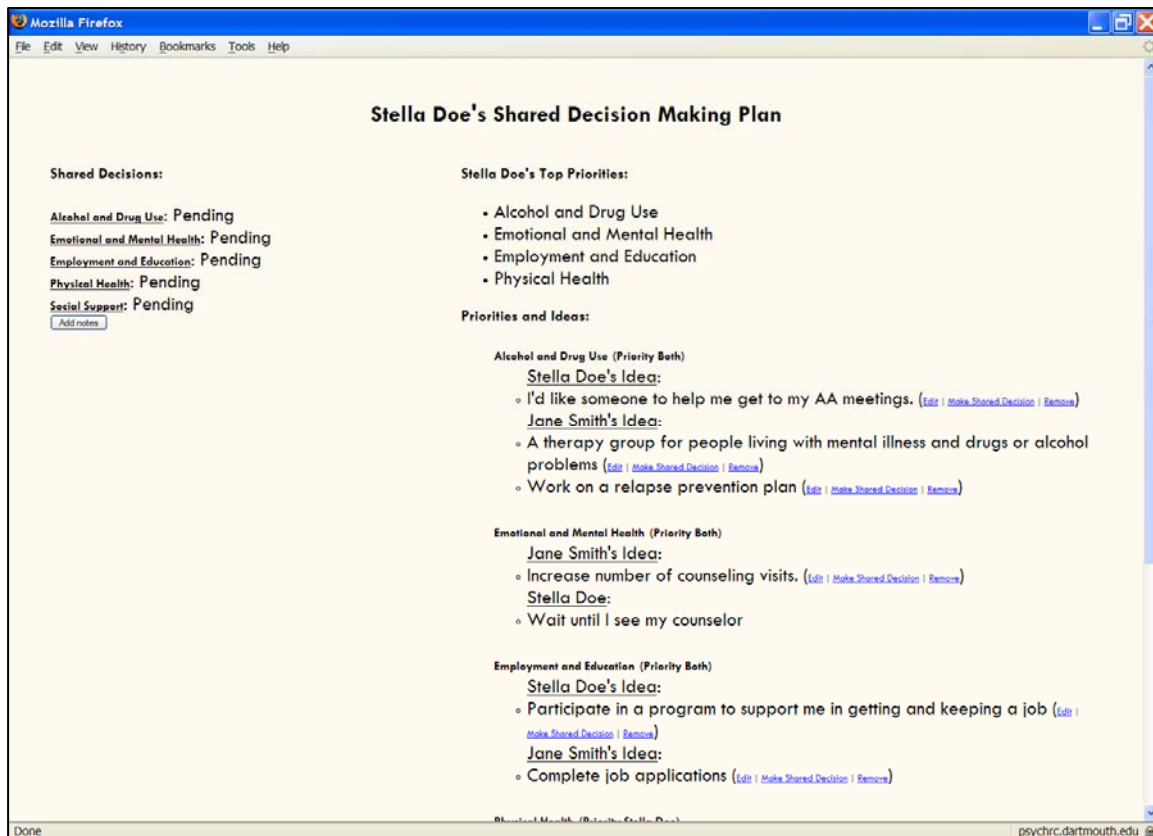

of which ideas will become shared decisions:

This screen depicts the process by which an idea is articulated into a shared decision:

**Stella Doe's Plan: Shared Decision Making**

**Alcohol and Drug Use Shared Decision:**

I'd like someone to help me get to my AA meetings.

How we will work together to act on our shared decision:

Next Action Step:

Stella Doe  
 Jane Smith  
 Both

by

**Next Action Step**

- Call my friend, Bob, to ask if he will go with me on Tuesdays by 8/30/2008 ( Stella Doe )
- Stella and Jane will attend an open meeting together once per month by 8/30/2008 ( Jane Smith and Stella Doe )

[Done Working with Shared Decision](#)

https://psychrc.dartmouth.edu/decisionmaker/sharedModuleInit.do?id=126 psychrc.dartmouth.edu

This is an example of a finished shared decision-making plan:

**Stella Doe's Plan: Shared Decisions**

File Edit View History Bookmarks Tools Help

**My Top Priorities**

- Alcohol and Drug Use
- Emotional and Mental Health
- Employment and Education
- Physical Health

**Shared Decisions**

**Alcohol and Drug Use**

- I'd like someone to help me get to my AA meetings.
  - Jane Smith and Stella Doe will: Stella and Jane will attend an open meeting together once per month by 8/30/2008
  - Stella Doe will: Call my friend, Bob, to ask if he will go with me on Tuesdays by 8/30/2008

**Emotional and Mental Health**

- Come to counseling 1 time per week.
  - Jane Smith will: Contact Stella's insurance company for ok for counseling by 8/28/2008
  - Stella Doe will: Come to MH center for counseling on Tuesdays

**My Comments**

**Emotional and Mental Health**  
I would like to not worry about things as much.

**Employment and Education**  
Need a job I like. I hate my job.

[Print this Report](#) [Next \(Finish\)](#)

**My Ratings**

★ = Top Priority  
Happy Where It's At  
Would Like To Change

|                               |                      |
|-------------------------------|----------------------|
| ★ Alcohol and Drug Use        | ██████████           |
| ★ Emotional and Mental Health | ████████████████     |
| ★ Employment and Education    | ████████████████████ |
| ★ Physical Health             | ██████████████████   |
| Social Support                | ██████████           |
| Daily Living                  | ██████████           |
| Family                        | ██████████           |
| Financial                     | ██████████████████   |
| Housing                       | ████                 |
| Legal                         | ██████████           |
| Spirituality and Culture      | ██████████████████   |

Done [psychrc.dartmouth.edu](http://psychrc.dartmouth.edu)
