# Supplementary figures and images for: Trial of an Electronic Decision Support System to Facilitate Shared Decision Making in Community Mental Health
Source: Atypon-hosted journal article supplement (doi:10.1176/ps.62.1.pss6201_0054), 2011-01-01

Figure 1. Overall Study Design

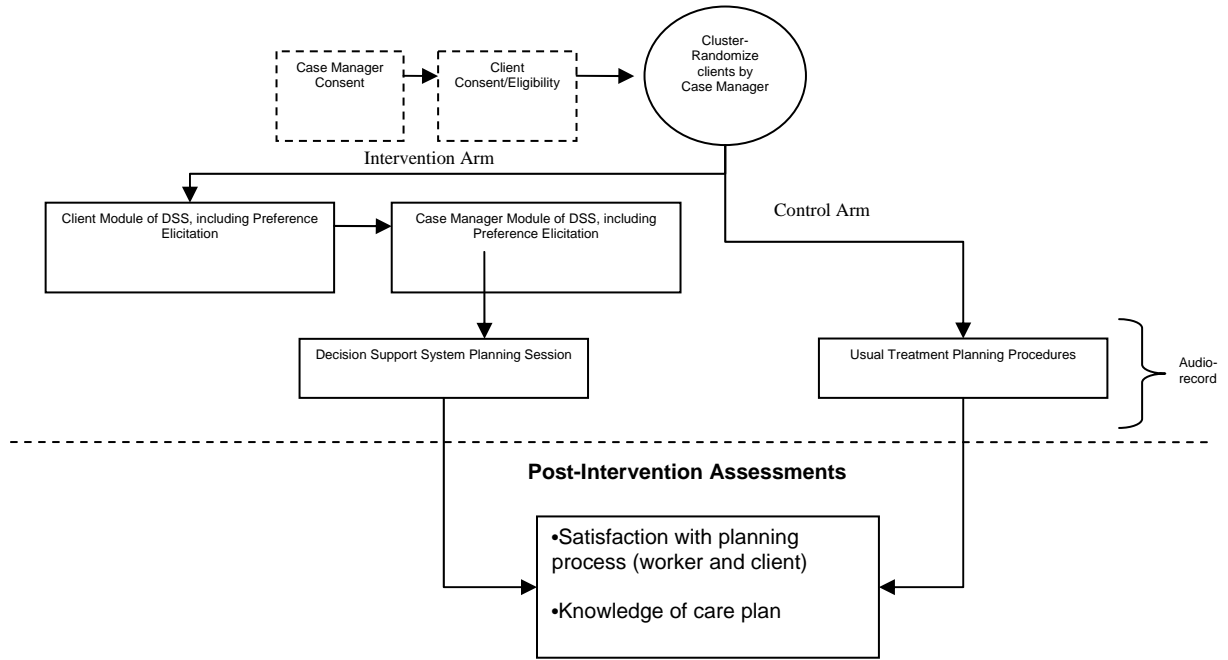

Supplement: Woltmann DS design.pdf [file Woltmann%20DS%20design.pdf]
